# Supplementary material for: Dolines and Cats: Remote Detection of Karst Depressions and Their Application to Study Wild Felid Ecology
Source: MDPI journal article supplement (doi:10.3390/rs14030656), 2022-01-29
Supplement: s1 [file s1]

## **Dolines and cats: remote detection of karst depressions and their application to study wild felids' ecology**

Authors: Špela Čonč <sup>1</sup>, Teresa Oliveira <sup>2</sup>, Ruben Portas <sup>2,3</sup>, Rok Černe <sup>4</sup>, Mateja Breg Valjavec <sup>1</sup>, Miha Krofel <sup>2</sup>

<sup>1</sup> Anton Melik Geographical Institute Research Centre of the Slovenian Academy of Sciences and Arts, Novi trg 2, 1000 Ljubljana, Slovenia

<sup>2</sup> Department of Forestry, Biotechnical Faculty, University of Ljubljana, Večna pot 83, 1000 Ljubljana, Slovenia

<sup>3</sup> Leibniz Institute for Zoo and Wildlife Research, Department of Evolutionary Ecology, Alfred-Kowalke-Straße 17, 10315 Berlin, Germany

<sup>4</sup> Slovenia Forest Service, Večna pot 2, 1000 Ljubljana, Slovenia

**Supplementary file - List of figures and tables.**

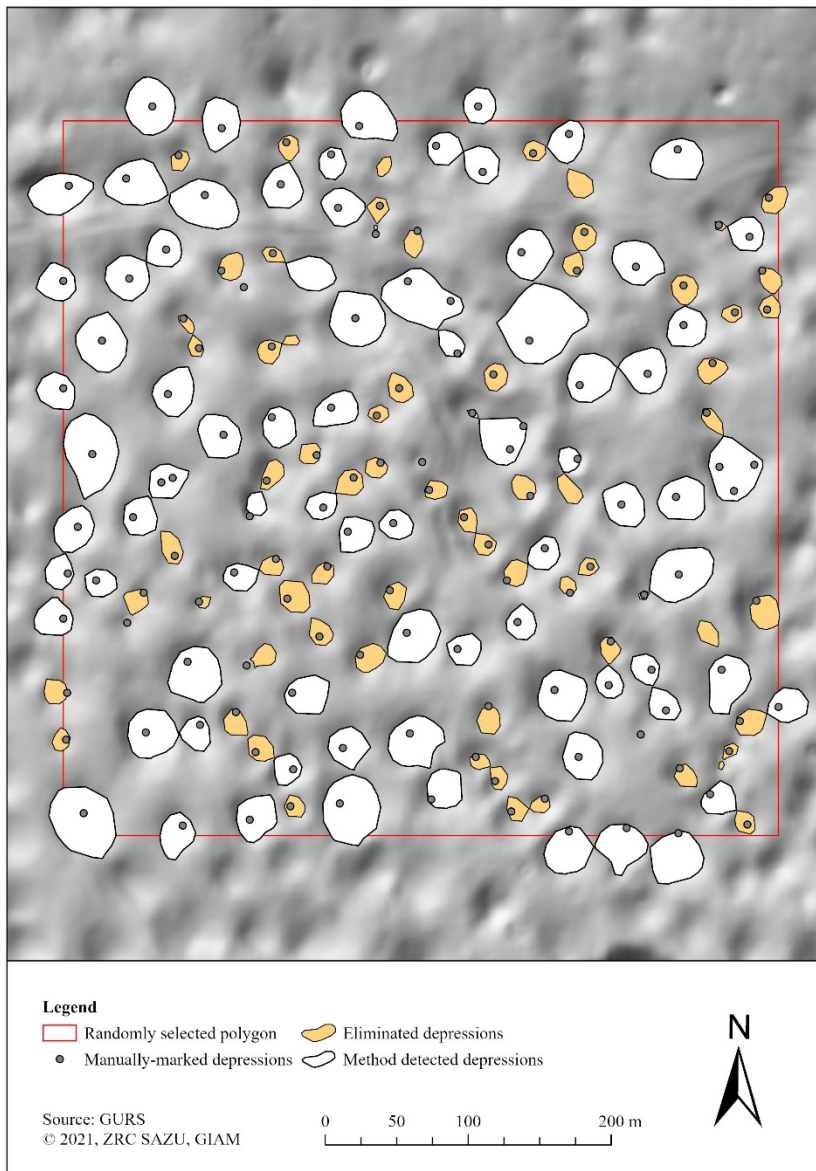

*Figure S1: Comparison of automatic-detection method with visual recognition based on shaded relief. Eliminated karst depressions did not fit to size criteria, i.e. depth was  $< 2$  m and diameter  $< 10$  m.*

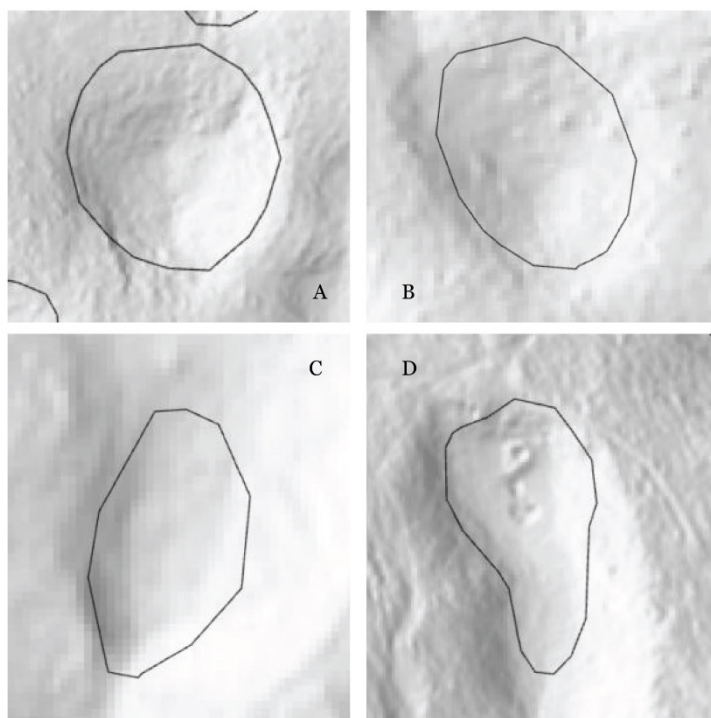

*Figure S2: Shape of depressions according to elongation values: circular or sub-circular (A), elliptical (B), sub-elliptical (C), elongated (D).*

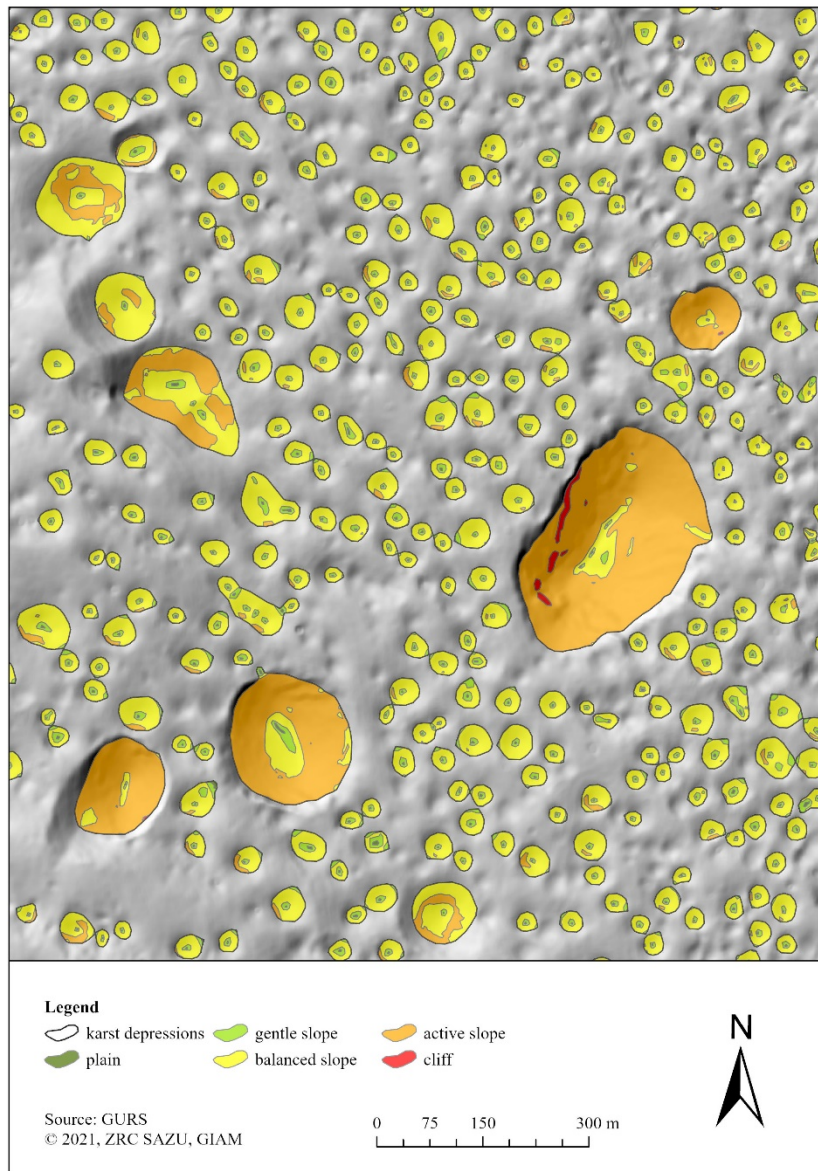

Figure S3: Map of geomorphological characteristics of karst depressions based on slope.

Table S1: Range of values [Min-Max] and associated median [median  $\pm$  IQR] for each covariate per species, for both used and available points.

| Lynx             |                            |                                 |                      |                           |
|------------------|----------------------------|---------------------------------|----------------------|---------------------------|
|                  | Dist_depressions<br>(used) | Dist_depressions<br>(available) | Dist_roads<br>(used) | Dist_roads<br>(available) |
| Min – Max        | 0.0 – 960.0                | 0.0 – 1504.8                    | 0.4 – 913.5          | 0.3 – 1006.3              |
| Median $\pm$ IQR | 25.0 $\pm$ 50.0            | 39.0 $\pm$ 113.8                | 180.1 $\pm$ 209.5    | 170.6 $\pm$ 242.1         |
| Wildcat          |                            |                                 |                      |                           |
|                  | Dist_depressions<br>(used) | Dist_depressions<br>(available) | Dist_roads<br>(used) | Dist_roads<br>(available) |
| Min – Max        | 0.0 – 277.8                | 0.0 – 298.3                     | < 0.1 – 637.8        | 0.6 – 678.2               |
| Median $\pm$ IQR | 32.2 $\pm$ 58.3            | 37.71 $\pm$ 66.2                | 217.0 $\pm$ 255.2    | 185.2 $\pm$ 228.6         |
